# Supplementary material for: New bedaquiline salt with improved bioavailability and reduced food effect
Source: Royal Society of Chemistry journal article supplement (doi:10.1039/d4ce00567h), 2024-01-01
Supplement: d4ce00567h1.pdf [file d4ce00567h1.pdf]

## New bedaquiline salt with improved bioavailability and reduced food effect

Xiaowen Zhang,<sup>ab</sup> Dongshuo Meng,<sup>ab</sup> Zongwu Zang,<sup>b</sup> Zhiru Xu<sup>\*b</sup> and Yu Liu<sup>\*ab</sup>

Table S1 Screening results of CCF (✓ means the formation of a co-crystal; × means that no cocrystal is formed)

| No. | CCF                     | Chemical structure                                                                  | Molar ratio | Evaporation | Slurry | Cooling | Grinding |
|-----|-------------------------|-------------------------------------------------------------------------------------|-------------|-------------|--------|---------|----------|
| 1   | L-Glutamic acid         | 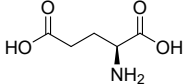   | 1:1         | ×           | ×      | ×       | ×        |
| 2   | L-Lysine                |   | 1:1         | ×           | ×      | ×       | ×        |
| 3   | Oxalic acid             |  | 1:1         | ×           | ×      | ×       | ×        |
| 4   | Succinic acid           |  | 1:1         | ×           | ×      | ×       | ×        |
| 5   | Adipic acid             |  | 1:1         | ×           | ×      | ×       | ×        |
| 6   | L-Tartaric acid         |  | 1:1         | ×           | ×      | ×       | ×        |
| 7   | Citric acid monohydrate |  | 1:1         | ×           | ×      | ×       | ×        |
| 8   | L-Malic acid            |  | 1:1         | ×           | ×      | ×       | ×        |
| 9   | Ascorbic acid           |  | 1:1         | ×           | ×      | ×       | ×        |

|    |                |                                                                                     |     |   |   |   |   |
|----|----------------|-------------------------------------------------------------------------------------|-----|---|---|---|---|
| 10 | Nicotinic acid | 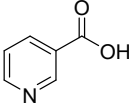   | 1:1 | × | × | × | × |
| 11 | Niacinamide    |    | 1:1 | × | × | × | × |
| 12 | Benzoic acid   |    | 1:1 | × | × | × | × |
| 13 | Propyl gallate |    | 1:1 | × | × | × | × |
| 14 | Sorbic acid    |    | 1:1 | × | × | × | × |
| 15 | Lactic acid    |    | 1:1 | × | × | × | × |
| 16 | Urea           |    | 1:1 | × | × | × | × |
| 17 | Nicotinamide   |  | 1:1 | × | × | × | × |
| 18 | L-Carnitine    |  | 1:1 | × | × | × | × |
| 19 | Saccharin      |  | 1:1 | √ | √ | √ | √ |
| 20 | Vanillin       |  | 1:1 | × | × | × | × |

Table S2 Dosing regimen for Beagle dogs (\* : The dose, concentration, and volume of administration are all based on BDQ free base.; IG: Intragastric gavage.)

| Group                   | 1                                                                                         | 2      | 3                                                | 4      |
|-------------------------|-------------------------------------------------------------------------------------------|--------|--------------------------------------------------|--------|
| Food Requirements       | Fasting for 12 hours prior to administration                                              |        | Administering concomitantly with a standard meal |        |
| Compound                | BDQ-FA                                                                                    | BDQ-SA | BDQ-FA                                           | BDQ-SA |
| Quantity                | 4                                                                                         | 4      | 4                                                | 4      |
| Route of Administration | IG                                                                                        | IG     | IG                                               | IG     |
| Dose* (mg/kg)           | 10                                                                                        | 10     | 10                                               | 10     |
| Concentration* (mg/mL)  | 4                                                                                         | 4      | 4                                                | 4      |
| Volume* (mL/kg)         | 2.5                                                                                       | 2.5    | 2.5                                              | 2.5    |
| Solvent Medium          | A mixed aqueous solution containing 10% (w/v) HPMC-E15 and 0.1% (v/v) Tween 80            |        |                                                  |        |
| Sampling Time Points    | 0.25, 0.5, 1, 2, 4, 8, 12, 24, 28, 32, 48, 72, 96, 144, 192, 216, 188, 360, 432 and 624 h |        |                                                  |        |

Table S3 Crystallographic data for BDQ-SA solvate

| Compounds                                             | BDQ-SA                                                            |
|-------------------------------------------------------|-------------------------------------------------------------------|
| formula                                               | C <sub>41</sub> H <sub>41</sub> BrN <sub>4</sub> O <sub>6</sub> S |
| Stoichiometry                                         | 1:1                                                               |
| Formula weight                                        | 797.75                                                            |
| Temperature/K                                         | 100                                                               |
| Crystal system                                        | orthorhombic                                                      |
| Space group                                           | <i>P</i> 2 <sub>1</sub> 2 <sub>1</sub> 2 <sub>1</sub>             |
| <i>a</i> /Å                                           | 9.0487(4)                                                         |
| <i>b</i> /Å                                           | 16.0617(10)                                                       |
| <i>c</i> /Å                                           | 26.2120(16)                                                       |
| <i>α</i> /°                                           | 90                                                                |
| <i>β</i> /°                                           | 90                                                                |
| <i>γ</i> /°                                           | 90                                                                |
| Volume/Å <sup>3</sup>                                 | 3809.6(4)                                                         |
| <i>Z</i>                                              | 4                                                                 |
| $\rho_{\text{calc}}$ /g cm <sup>-3</sup>              | 1.391                                                             |
| $\mu$ /mm <sup>-1</sup>                               | 1.187                                                             |
| F(000)                                                | 1656.0                                                            |
| Crystal size/mm <sup>3</sup>                          | 0.12 × 0.08 × 0.05                                                |
| Radiation                                             | MoK $\alpha$ ( $\lambda$ = 0.71073)                               |
| 2 $\theta$ range for data collection/°                | 4.012 to 52.826                                                   |
| Index ranges                                          | -11 ≤ <i>h</i> ≤ 11, -16 ≤ <i>k</i> ≤ 20, -21 ≤ <i>l</i> ≤ 32     |
| Reflections collected                                 | 20424                                                             |
| Independent reflections                               | 7785 [R <sub>int</sub> = 0.0855, R <sub>sigma</sub> = 0.1257]     |
| Data/restraints/parameters                            | 7785/0/486                                                        |
| Goodness-of-fit on F <sup>2</sup>                     | 0.997                                                             |
| Final R indexes [ <i>I</i> ≥ 2 $\sigma$ ( <i>I</i> )] | R <sub>1</sub> = 0.0514, wR <sub>2</sub> = 0.0820                 |
| Final R indexes [all data]                            | R <sub>1</sub> = 0.0950, wR <sub>2</sub> = 0.0997                 |
| Largest diff. peak/hole / e Å <sup>-3</sup>           | 0.36/-0.51                                                        |
| Flack parameter                                       | 0.005(8)                                                          |

Table S4 Hydrogen bonding distance and angles for BDQ-SA solvate

| D-H...A    | Symmetry   | D-H(Å) | H...A(Å) | D...A(Å) | ∠D-H...A(°) |
|------------|------------|--------|----------|----------|-------------|
| O5-H4...O6 | x, y, z    | 0.84   | 2.31     | 2.824(4) | 120.4       |
| O6-H3...O2 | -1+x, y, z | 0.87   | 2.03     | 2.899(4) | 173.1       |
| O6-H2...O1 | x, y, z    | 0.87   | 1.95     | 2.768(4) | 156.3       |
| N2-H1...O1 | x, y, z    | 0.93   | 1.80     | 2.712(5) | 166.8       |

Table S5 The IR spectral characteristic peaks of BDQ, SA and BDQ-SA

| Compound | Wave number                                                                                                         | Vibration type   | Group attribution                               |
|----------|---------------------------------------------------------------------------------------------------------------------|------------------|-------------------------------------------------|
| BDQ      | 3052 cm <sup>-1</sup>                                                                                               | δ <sub>C-H</sub> |                                                 |
|          | 1455 cm <sup>-1</sup>                                                                                               | δ <sub>C-C</sub> | -phenyl                                         |
|          | 1017 cm <sup>-1</sup> , 919 cm <sup>-1</sup> , 710 cm <sup>-1</sup> , 697 cm <sup>-1</sup>                          | ν <sub>C-H</sub> |                                                 |
|          | 2945 cm <sup>-1</sup> , 2826 cm <sup>-1</sup> , 2781 cm <sup>-1</sup>                                               | δ <sub>C-H</sub> | -N(CH <sub>3</sub> ) <sub>2</sub>               |
|          | 1596 cm <sup>-1</sup>                                                                                               | δ <sub>C-C</sub> | -quinolyl                                       |
|          | 1394 cm <sup>-1</sup>                                                                                               | δ <sub>C-H</sub> | -naphthyl                                       |
|          | 1246 cm <sup>-1</sup>                                                                                               | δ <sub>C-C</sub> |                                                 |
|          | 1340 cm <sup>-1</sup>                                                                                               | ν <sub>C-H</sub> | -methylene                                      |
| SA       | 3091 cm <sup>-1</sup> , 2946 cm <sup>-1</sup> , 2691 cm <sup>-1</sup>                                               | δ <sub>C-H</sub> |                                                 |
|          | 1592 cm <sup>-1</sup> , 701 cm <sup>-1</sup>                                                                        | δ <sub>C-C</sub> | -phenyl                                         |
|          | 1457 cm <sup>-1</sup> , 1174 cm <sup>-1</sup> , 1118 cm <sup>-1</sup> , 898 cm <sup>-1</sup> , 757 cm <sup>-1</sup> | ν <sub>C-H</sub> |                                                 |
|          | 1715 cm <sup>-1</sup>                                                                                               | δ <sub>C=O</sub> | -carbonyl                                       |
|          | 1332 cm <sup>-1</sup> , 588 cm <sup>-1</sup>                                                                        | ν <sub>S=O</sub> | -sulfonyl                                       |
|          | 1295 cm <sup>-1</sup>                                                                                               | ν <sub>N-H</sub> | imino-                                          |
| BDQ-SA   | 3440 cm <sup>-1</sup>                                                                                               | ν <sub>O-H</sub> | -OH                                             |
|          | 3048 cm <sup>-1</sup> , 2952 cm <sup>-1</sup>                                                                       | δ <sub>C-H</sub> | -NH(CH <sub>3</sub> ) <sub>2</sub> <sup>+</sup> |
|          | 2817 cm <sup>-1</sup>                                                                                               | ν <sub>C-H</sub> |                                                 |
|          | 1680 cm <sup>-1</sup>                                                                                               | δ <sub>C=O</sub> | -carbonyl                                       |
|          | 1590 cm <sup>-1</sup>                                                                                               | δ <sub>C-C</sub> | -quinolyl                                       |

|                                                                                                                                                                                                                                                      |                |           |
|------------------------------------------------------------------------------------------------------------------------------------------------------------------------------------------------------------------------------------------------------|----------------|-----------|
| 1340 cm <sup>-1</sup> , 1240 cm <sup>-1</sup>                                                                                                                                                                                                        | $\nu_{C-H}$    | -naphthyl |
| 1460 cm <sup>-1</sup>                                                                                                                                                                                                                                | $\delta_{C-C}$ |           |
| 1390 cm <sup>-1</sup> , 1150 cm <sup>-1</sup> ,<br>1120 cm <sup>-1</sup> , 1090 cm <sup>-1</sup> ,<br>1020 cm <sup>-1</sup> , 959 cm <sup>-1</sup> , 869<br>cm <sup>-1</sup> , 818 cm <sup>-1</sup> , 788 cm <sup>-1</sup> ,<br>771 cm <sup>-1</sup> | $\nu_{C-H}$    | -phenyl   |
| 604 cm <sup>-1</sup>                                                                                                                                                                                                                                 | $\nu_{S=O}$    | -sulfonyl |

Table S6 <sup>1</sup>H-NMR results of BDQ-SA

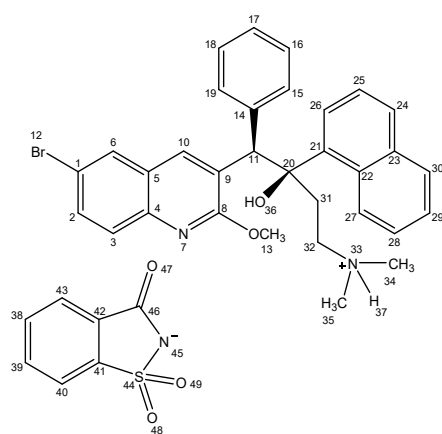

| position | $\delta$ H(ppm)            | position | $\delta$ H(ppm)                   | position | $\delta$ H(ppm)    |
|----------|----------------------------|----------|-----------------------------------|----------|--------------------|
| 2        | 8.04-7.59 (m, 13H)         | 19       | 7.27-7.28 (m, 2H)                 | 32       | 3.67-3.59 (m, 2H)  |
| 3        | 8.04-7.59 (m, 13H)         | 24       | 8.38 (d, $J = 7.4$ Hz, 1H)        | 34       | 2.90 (s, 6H)       |
| 6        | 8.95 (d, $J = 8.8$ Hz, 1H) | 25       | 8.04-7.59 (m, 13H)                | 35       | 2.90 (s, 6H)       |
| 10       | 8.04-7.59 (m, 13H)         | 26       | 8.04-7.59 (m, 13H)                | 36       | 6.27 (s, 1H)       |
| 11       | 5.91(s, 1H)                | 27       | 8.22 (dd, $J = 8.8, 5.0$ Hz, 2H), | 37       | 7.24 (s, 1H)       |
| 13       | 4.60 (s, 3H)               | 28       | 8.22 (dd, $J = 8.8, 5.0$ Hz, 2H), | 38       | 8.04-7.59 (m, 12H) |
| 15       | 7.27-7.28 (m, 2H)          | 29       | 8.04-7.59 (m, 13H)                | 39       | 8.04-7.59 (m, 13H) |
| 16       | 8.04-7.59 (m, 13H)         | 30       | 8.04-7.59 (m, 13H)                | 40       | 8.04-7.59 (m, 13H) |

|    |                       |    |                   |    |              |
|----|-----------------------|----|-------------------|----|--------------|
| 17 | 8.04-7.59 (m,<br>13H) | 31 | 2.44-2.36 (m, 2H) | 43 | 8.82 (s, 1H) |
| 18 | 8.04-7.59 (m,<br>13H) | -- | --                | -- | --           |

Table S7 The results of hygroscopicity and chemical stability

| Investigation<br>Items | Content (%) |              |              |
|------------------------|-------------|--------------|--------------|
|                        | 60 °C       | 25 °C/RH 60% | 45 °C/RH 75% |
| 0 d                    | 99.74       | 99.74        | 99.74        |
| 5 d                    | 99.74       | 99.70        | 99.74        |
| 10 d                   | 99.72       | 99.71        | 99.73        |
| 30 d                   | 99.67       | 99.70        | 99.73        |

Table S8 Comparison of solubility of BDQ in different dissolution mediums

| The dissolution media        | LOD<br>(µg/mL) | BDQ<br>(µg/mL) |
|------------------------------|----------------|----------------|
| pH 1.0                       | 0.2            | 81.5           |
| pH 2.0                       | 0.2            | 104.2          |
| pH 4.5                       | 0.2            | 8.2            |
| pH 4.5 (added 0.1% Tween 80) | 0.2            | 35.9           |
| pH 6.8                       | 0.2            | 5.0            |
| pH 6.8(added 0.1% Tween 80)  | 0.2            | 26,3           |
| Water                        | 0.2            | 4.4            |
| Water (added 0.1% Tween 80)  | 0.2            | 21.8           |

Table S9 Comparison of buffer pH before and after dissolution experiments

| The dissolution<br>media | BDQ-SA |       | BDQ-FA |       |
|--------------------------|--------|-------|--------|-------|
|                          | before | after | before | after |
| pH1.0                    | 1.02   | 1.06  | 1.02   | 1.07  |
| pH2.0                    | 2.03   | 2.10  | 2.03   | 2.09  |
| pH4.5                    | 4.55   | 4.59  | 4.55   | 4.61  |
| pH6.8                    | 6.87   | 6.92  | 6.87   | 6.90  |
| Water                    | 6.69   | 6.77  | 6.69   | 6.75  |

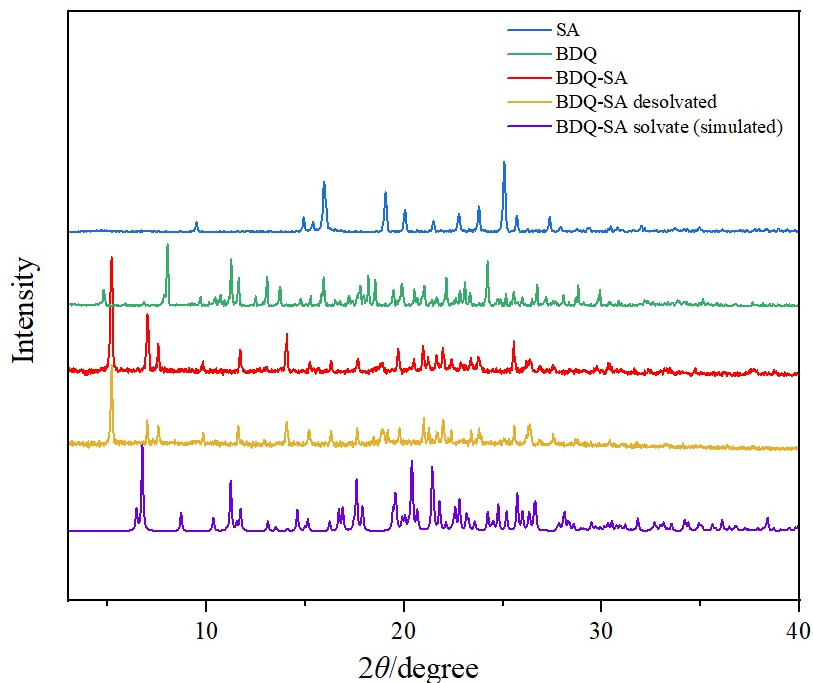

Figure S1 PXR D patterns of BDQ, SA, BDQ-SA, BDQ-SA desolvated and BDQ-SA solvate (simulated)

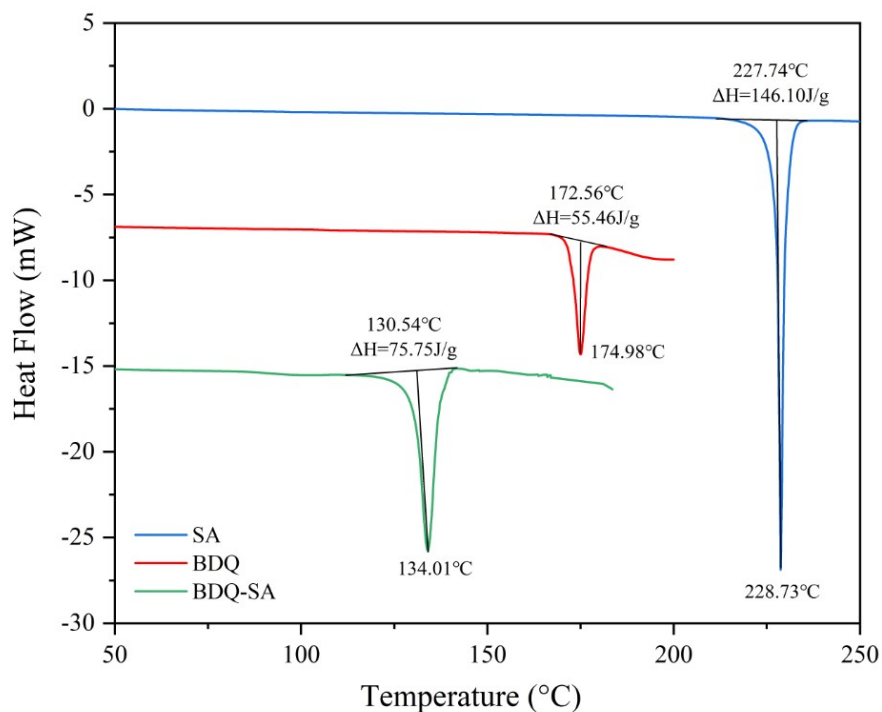

Figure S2 DSC maps of BDQ, SA and BDQ-SA



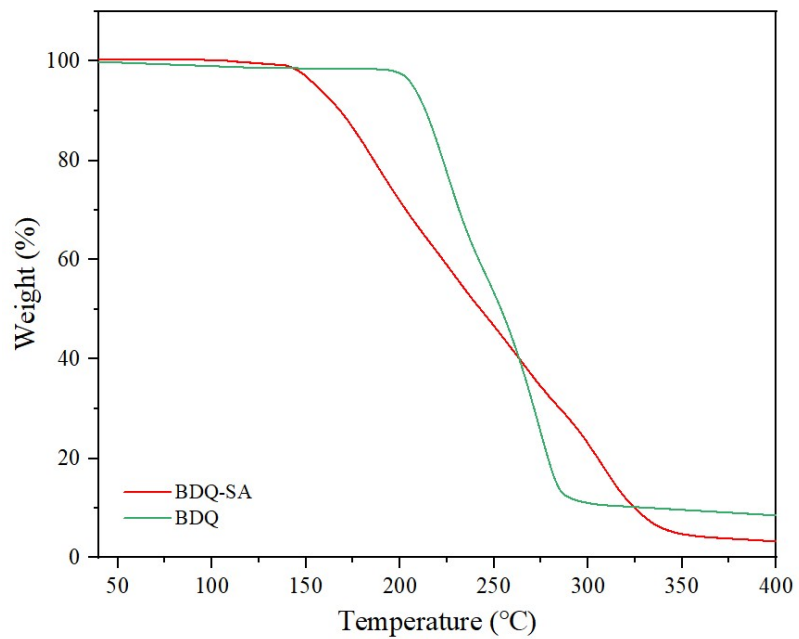

Figure S3 TGA maps of BDQ and BDQ-SA

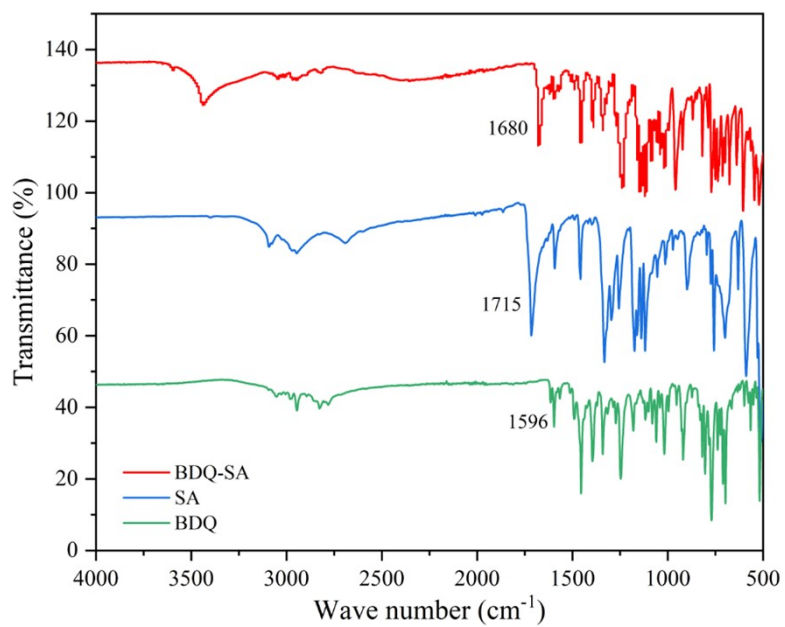

Figure S4 FT-IR maps of BDQ, SA and BDQ-SA

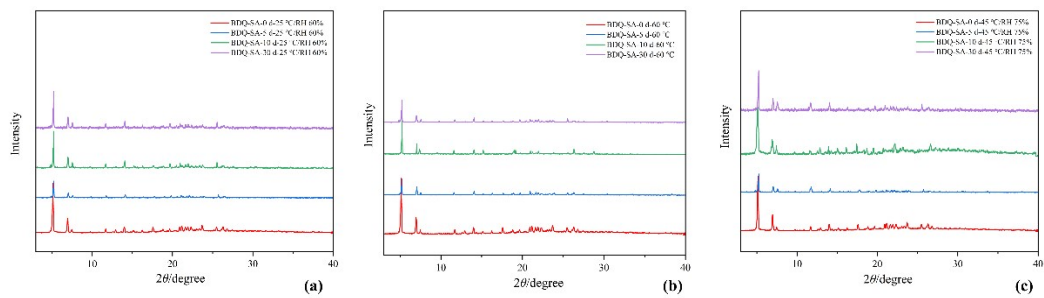

Figure S5 PXRD results of stability experiment

(a) 25 °C/ RH 60%, (b)60 °C, (c)45 °C/ RH 75%

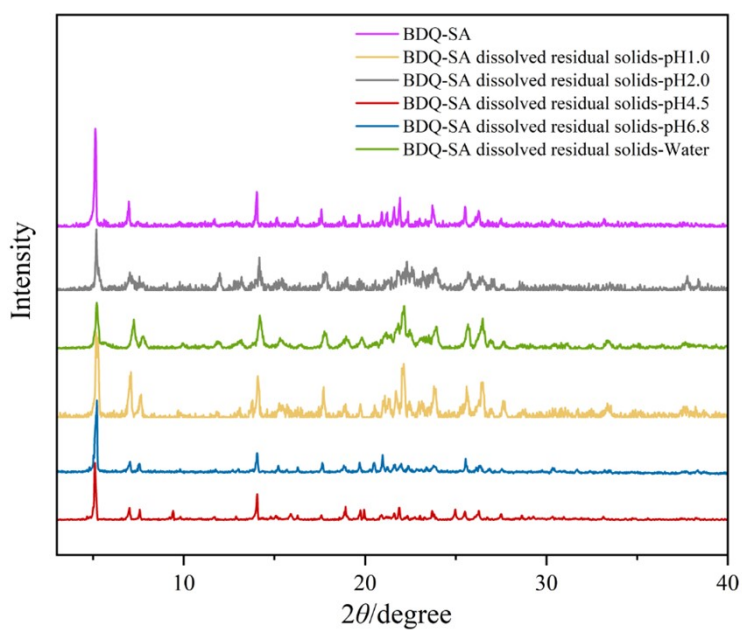

Figure S6 PXRD results of dissolved residual solids
